# Supplementary material
Source: Springer Nature journal article supplement (https://www.springermedizin.de/resource/supplementary/13058_2012_3169_MOESM4_ESM.pdf/9703428)

A

5 *ERBB2*-amplified tumor tissues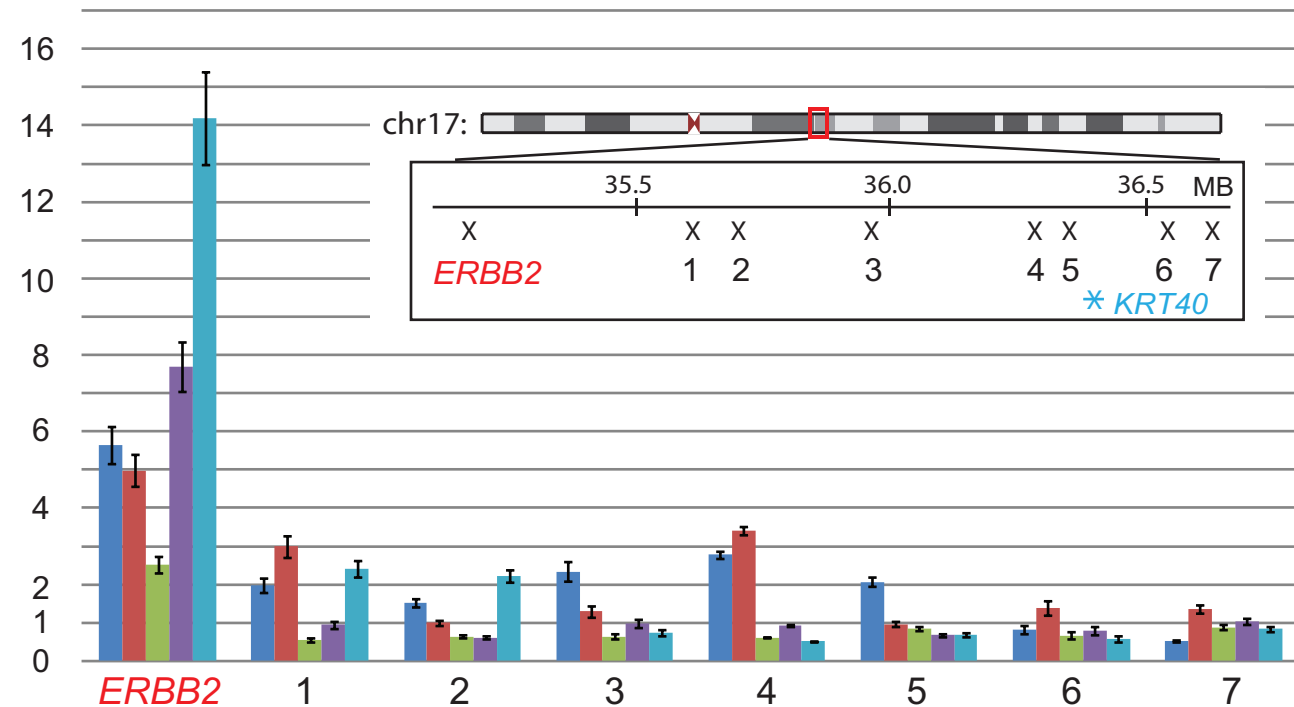

B

## 7 non-cancerous tissues

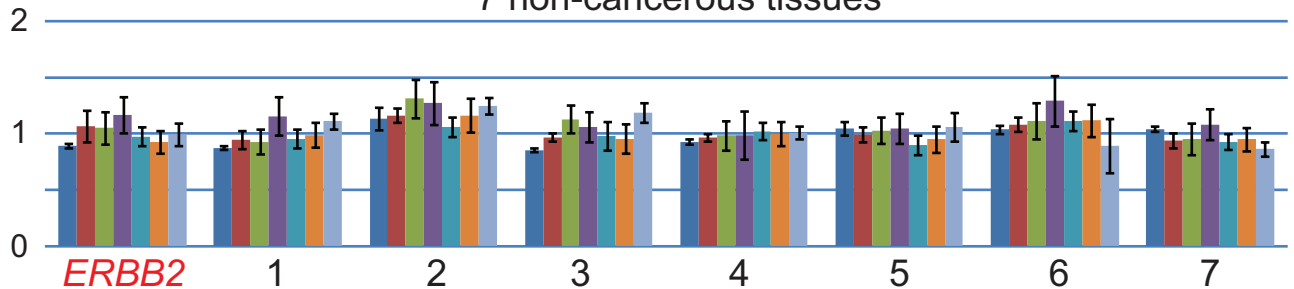

C

10 *ERBB2* non-amplified tumor tissues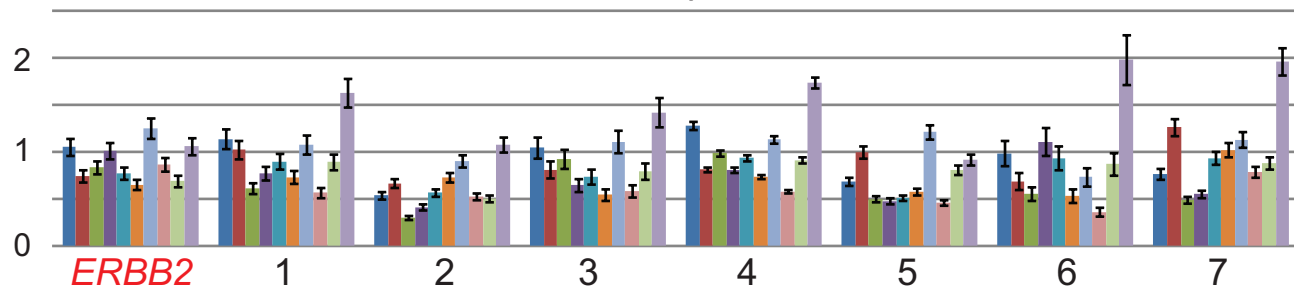

Supplement: MOESM4 [file 9703428]
